# Supplementary material for: Construction of Pd–TiOx interfaces for selective hydrodeoxygenation of CO bonds in vanillin by supporting Pd nanoparticles on ETS-10 zeolite
Source: Royal Society of Chemistry journal article supplement (doi:10.1039/d3su00271c), 2023-11-14
Supplement: d3su00271c1.pdf [file d3su00271c1.pdf]

## Supplementary Material

### **Construction of Pd-TiO<sub>x</sub> interfaces for selective hydrodeoxygenation of C=O bands in vanillin by supporting Pd nanoparticles on ETS-10 zeolite**

Jianbin Huang,<sup>a†</sup> Chang Zhou,<sup>a†</sup> Jian Zhang,<sup>\*a</sup> Hao Meng,<sup>a</sup> Shiyao Lu,<sup>b</sup> and Feng-Shou Xiao<sup>\*ab</sup>

<sup>a</sup> *Beijing Advanced Innovation Center for Soft Matter, Science and Engineering, Beijing University of Chemical Technology, Beijing 100029, China.*

<sup>b</sup> *Key Lab of Biomass Chemical Engineering of Ministry of Education, College of Chemical and Biological Engineering, Zhejiang University, Hangzhou 310027, China.*

<sup>†</sup> *These authors contribute equally.*

<sup>\*</sup>*E-mail addresses: jianzhangbuct@mail.buct.edu.cn (J. Zhang); fsxiao@zju.edu.cn (F.-S. Xiao).*

## Supplementary Figures

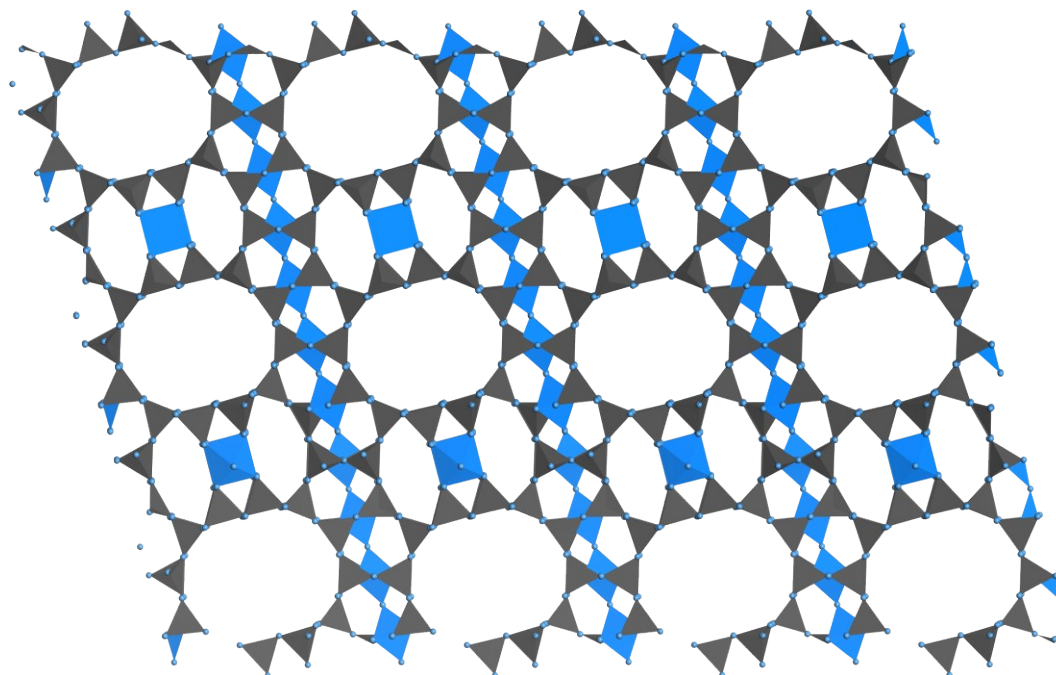

**Fig. S1** Framework structure of ETS-10. TiO<sub>x</sub> nanowires and SiO<sub>2</sub> framework are shown in blue and gray, respectively. The counter cations (H<sup>+</sup>, Na<sup>+</sup> and K<sup>+</sup>) are not shown for clarity.

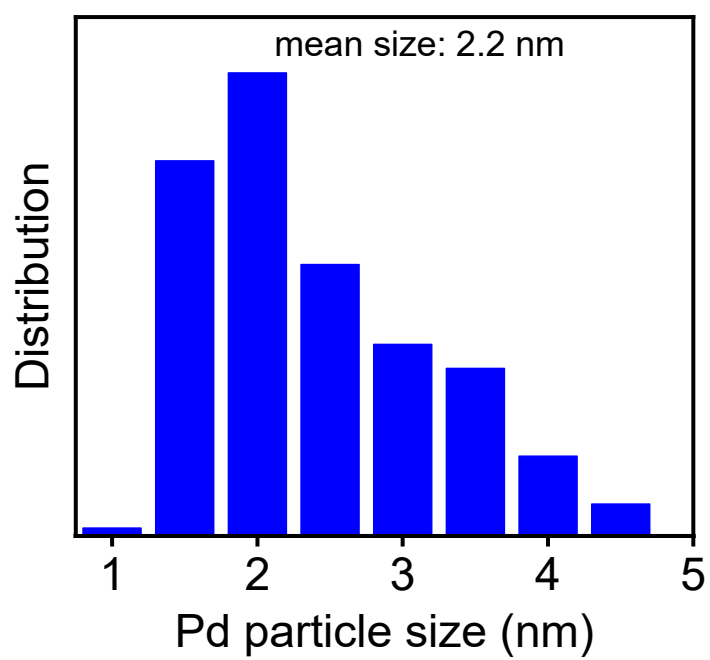

**Fig. S2** Pd nanoparticle size distribution of the Pd/ETS-10 sample.

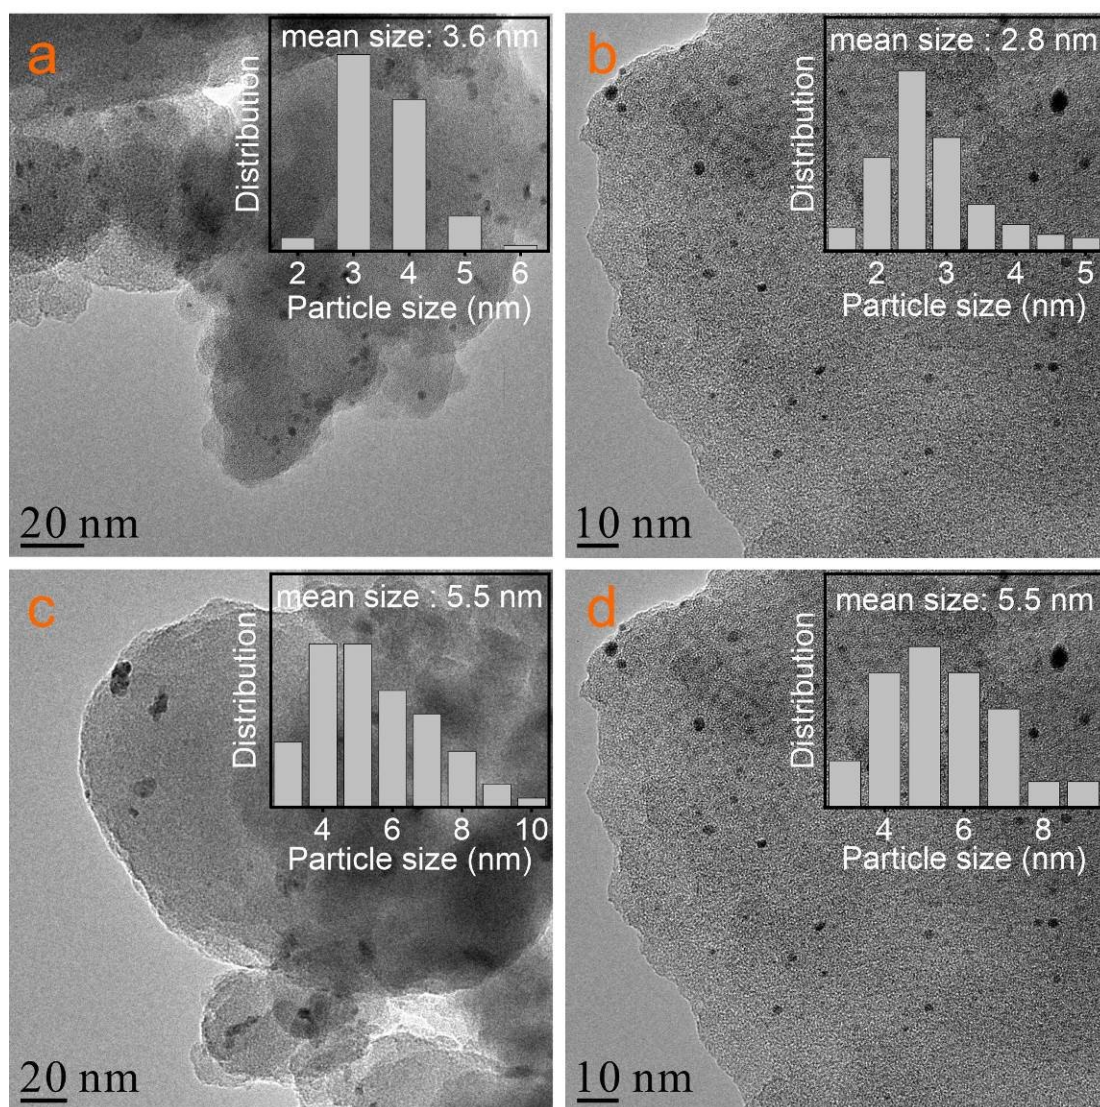

**Fig. S3** TEM images of the (a) Ru/ETS-10, (b) Pt/ETS-10, (c) Rh/ETS-10, and (d) Au/ETS-10. Insets: metal particle size distributions.

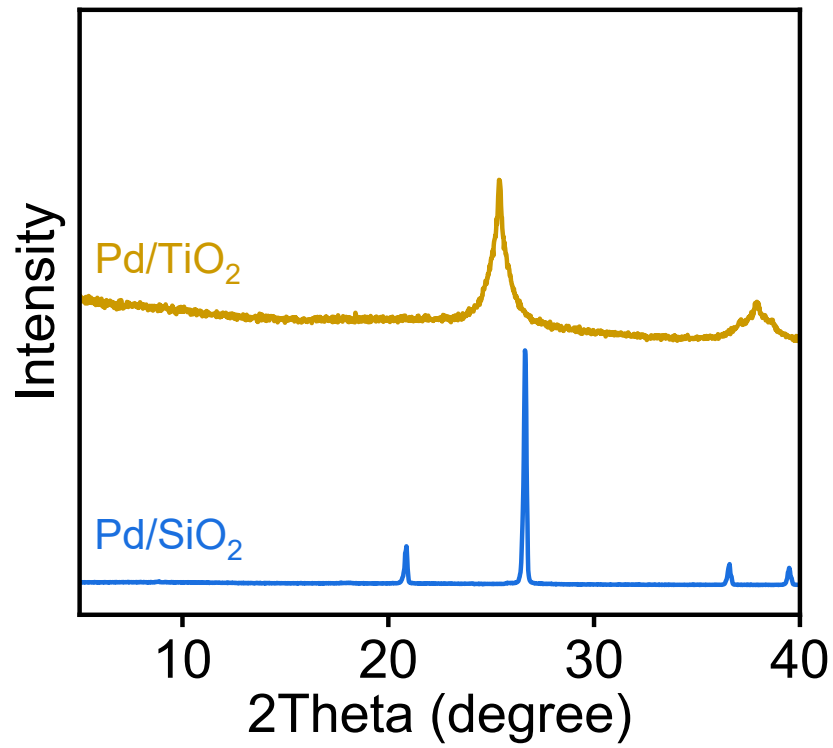

**Fig S4.** XRD patterns of the Pd/TiO<sub>2</sub> and Pd/SiO<sub>2</sub> samples.

**Note:** The TiO<sub>2</sub> and SiO<sub>2</sub> were of anatase and quartz phase, respectively.

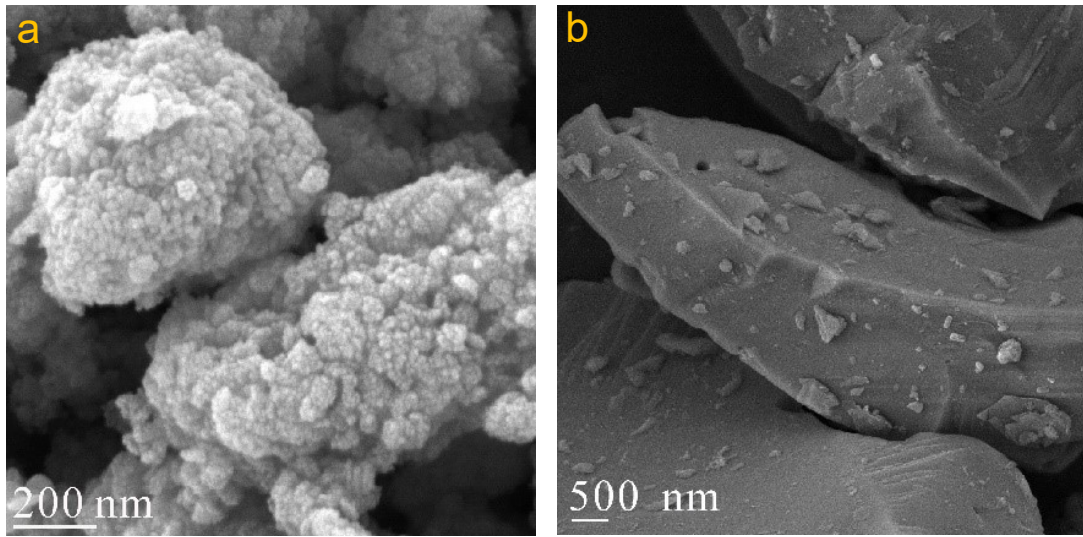

**Fig S5.** SEM images of the (a) Pd/TiO<sub>2</sub> and (b) Pd/SiO<sub>2</sub> samples.

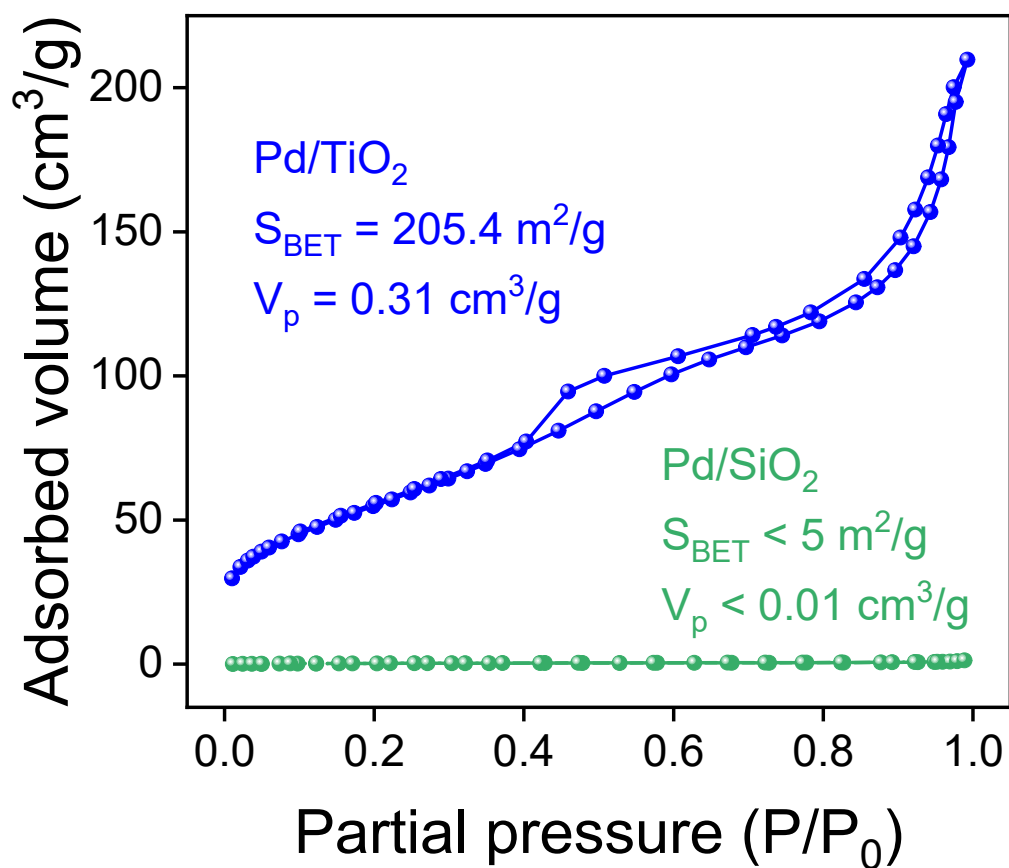

Fig S6.  $\text{N}_2$  sorption isotherms of the  $\text{Pd}/\text{TiO}_2$  and  $\text{Pd}/\text{SiO}_2$  samples.

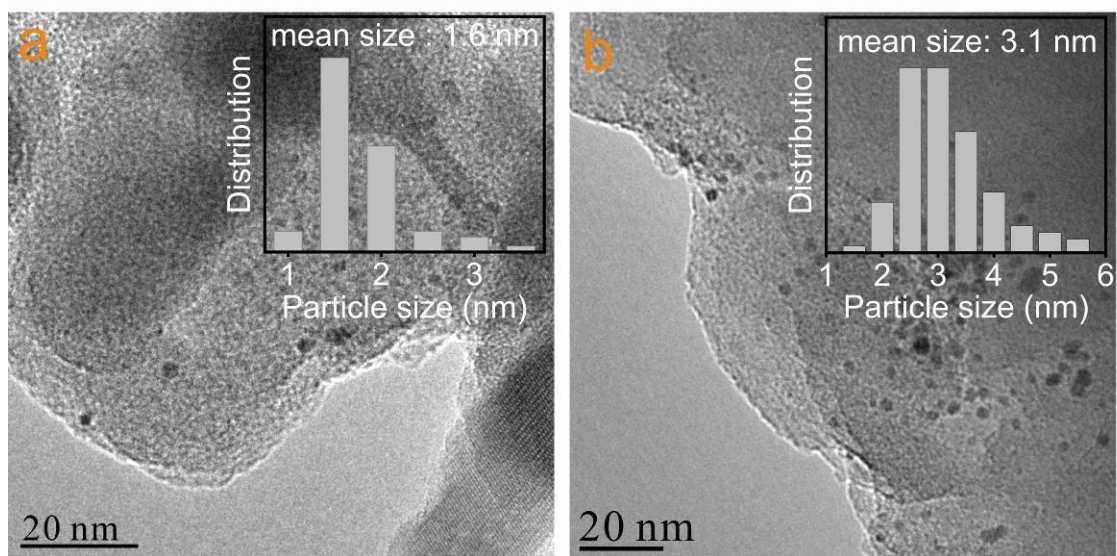

**Fig. S7** TEM images of the (a) Pd/TiO<sub>2</sub> and (b) Pd/SiO<sub>2</sub> samples. Insets: metal particle size distributions.



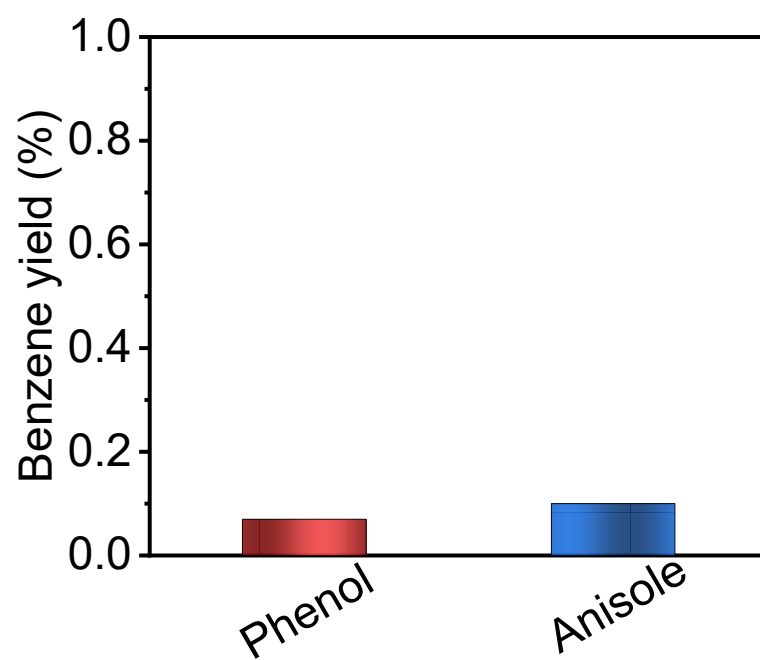

**Fig. S8** Catalytic hydrodeoxygenation of phenol and anisole over various catalysts. Typical reaction conditions: 6.6 mmol of substrate, 0.2 g of catalyst, 50 g of H<sub>2</sub>O, 1 MPa of H<sub>2</sub>, 120 °C, and 1.5 h.

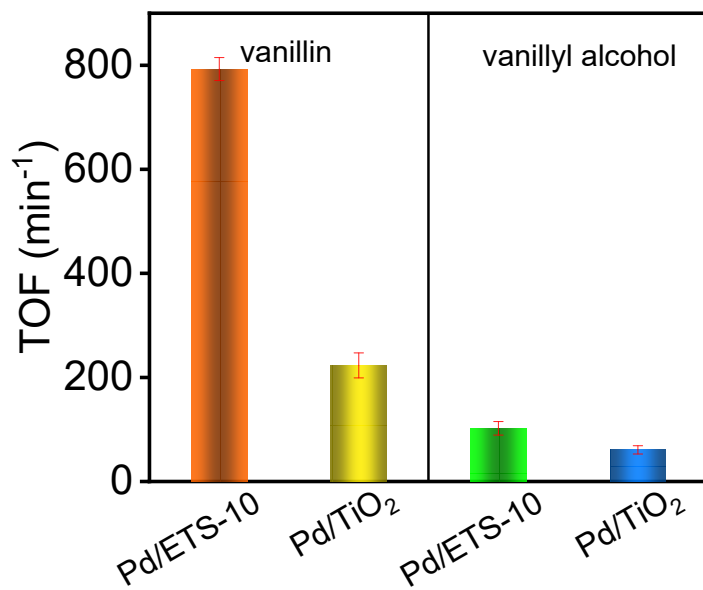

**Fig. S9** TOF values in the catalytic hydrodeoxygenation of vanillin and vanillyl alcohol.

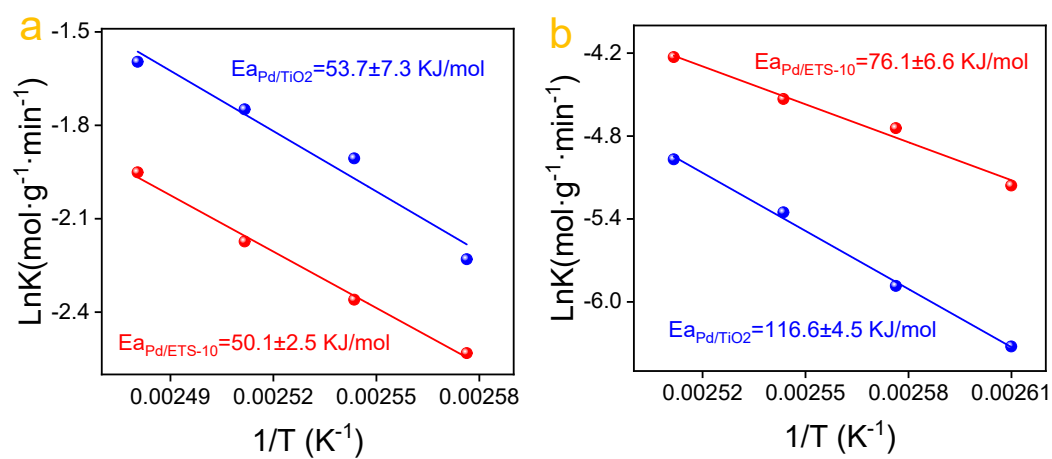

**Fig. S10** Activation energies of (a) vanillin and (b) vanillyl alcohol over the Pd/ETS-10 and Pd/TiO<sub>2</sub> catalysts. Reaction conditions for vanillin reaction: 400 mg of vanillin, 2 mg of catalyst, 20 g of H<sub>2</sub>O, 1 MPa of H<sub>2</sub>, 120 °C, 0.083 h. Reaction conditions for vanillyl alcohol: 100 mg of vanillyl alcohol, 1 mg of catalyst, 5 g of H<sub>2</sub>O, 1 MPa of H<sub>2</sub>, 120 °C, and 0.083 h.

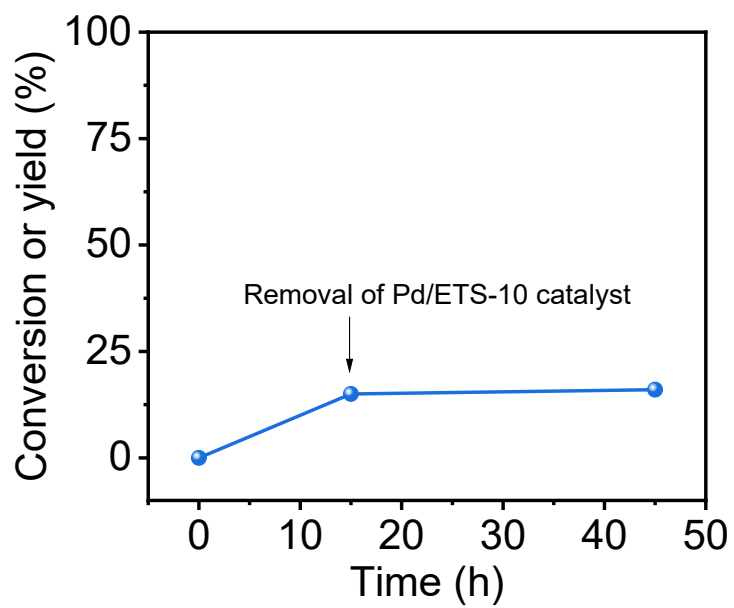

**Fig. S11** Dependence of catalytic activity in hydrodeoxygenation of vanillin on time for a reaction system before and after separation of Pd/ETS-10 catalyst. Reaction conditions: 200 mg of vanillin, 5.1 mg of catalyst, 10 g of H<sub>2</sub>O, 1 MPa of H<sub>2</sub>, 120 °C.

## Supplementary Table

**Table S1.** Textual parameters of the Pd catalysts.

| Sample              | metal loading amount (wt%) <sup>a</sup> |
|---------------------|-----------------------------------------|
| Pd/ETS-10           | 0.33                                    |
| Pd/TiO <sub>2</sub> | 0.46                                    |
| Pd/SiO <sub>2</sub> | 0.20                                    |
| Pt/ETS-10           | 0.67                                    |
| Au/ETS-10           | 0.12                                    |
| Rh/ETS-10           | 0.91                                    |
| Ru/ETS-10           | 1.04                                    |

<sup>a</sup> determined by ICP analysis

**Table S2.** Comparison of the catalytic results between the Pd/ETS-10 catalyst and the selected examples of some representative Pd and no-noble catalysts in the hydrodeoxygenation of vanillin.

| Catalyst                | Temperature (°C) | Time (h) | P <sub>H<sub>2</sub></sub> (MPa) | Conversion (%) | Selectivity (%) | Reference |
|-------------------------|------------------|----------|----------------------------------|----------------|-----------------|-----------|
| Pd/C                    | 100              | 3        | 3                                | 100            | 92              | [1]       |
| Pd-PTA/ZrO <sub>2</sub> | 80               | 1.5      | 0.1                              | >99            | >99             | [2]       |
| Pd/PHS                  | R.T.             | 8        | 2                                | >99            | 98.2            | [3]       |
| Pd/BC                   | 60               | 4        | 2                                | >99            | 92.8            | [4]       |
| Ga-Cu/HNZY              | 180              | 2.5      | 1                                | >99            | >99             | [5]       |
| Ni <sub>2</sub> P/HY    | 220              | 5        | 2                                | >99            | >99             | [6]       |
| Ni <sub>3</sub> Co@NC@C | 170              | 2        | 1                                | >99            | >99             | [7]       |
| Pd/ETS-10               | 60               | 5        | 2                                | >99            | 93.0            | This work |

**Note:** The selection criteria are as-follows: Pd catalysts are active for the hydrodeoxygenation of vanillin at different reaction temperatures. Therefore, we chose several representative Pd-based catalysts performed at different reaction temperatures (references 1-4). Notably, at the same temperature, our Pd/ETS-10 catalyst exhibited comparable activity to that of the Pd/BC catalyst (reference 4). In addition, we also compared our catalyst with representative non-noble metal catalysts (references 5-7). Notably, our Pd/ETS-10 catalyst is more active than the Ni, Co, and Cu catalysts.

## References

- 1 J. L. Santos, P. Mäki-Arvela, J. Wärnä, A. Monzón, M. A. Centeno and D. Y. Murzin, *Appl. Catal. B-Environ.*, 2020, **268** 118425.
- 2 Z. Gao, Z. Zhou, M. Wang, N. Shang, W. Gao, X. Cheng, S. Gao, Y. Gao and C. Wang, *Fuel*, 2023, **234** 126768.
- 3 R. Yangcheng, Y. Cui, S. Luo, J. Ran and J. Wang, *Micropor. Mesopor. Mater.*, 2023, **350**, 112460.
- 4 J. Ran, R. YangCheng, Y. Cui and J. Wang, *ACS Sustain. Chem. Eng.*, 2022, **10**, 7277-7287.
- 5 D. Verma, R. Insyani, H. S. Cahyadi, J. Park, S. M. Kim, J. M. Cho, J. W. Bae and J. Kim, *Green. Chem.*, 2018, **20**, 3253-3270.
- 6 Y. Y. Geng, M. Lang, G. T. Li, W. Y, Z. S. Yang and H, L, *Catal. Lett.*, 2023, **153**, 911-920.
- 7 Y. P. Z, J. W. Z, G. L. F, L. Y and F, L, *Dalton. Trans.*, 2022, **51**, 2238-2249.
